# Supplementary material for: Depressed Mood as a Significant Risk Factor for Gynecological Cancer Aggravation
Source: MDPI journal article supplement (doi:10.3390/ijerph20196874), 2023-10-02
Supplement: s1 [file s1]

Supplementary Materials

**Table S1.** Other characteristics and Cox proportional hazards of DFS in univariate analysis for each group not shown in Table 1.

|                                      | Non-Depressed<br>Mood<br>(N = 129) | Depressed Mood<br>(N = 88) | <i>p</i> -value | Risk factors for DFS |               |                 |
|--------------------------------------|------------------------------------|----------------------------|-----------------|----------------------|---------------|-----------------|
|                                      |                                    |                            |                 | HR                   | 95% CI        | <i>p</i> -value |
| Height (cm), M±SD                    | 155.29±5.58                        | 155.57±6.22                | 0.723           | 1.00                 | (0.95, 1.05)  | 0.979           |
| Weight (kg), M±SD                    | 59.09±12.21                        | 56.43±10.61                | 0.100           | 0.99                 | (0.97, 1.01)  | 0.409           |
| BMI (kg/m <sup>2</sup> ), M±SD       | 24.56±4.99                         | 23.56±4.70                 | 0.140           | 0.99                 | (0.94, 1.04)  | 0.694           |
| Parity status, N (%)                 |                                    |                            | 0.260           |                      |               |                 |
| Parity = 0                           | 31 (24.0%)                         | 28 (31.8%)                 |                 | 1.00                 | Reference     |                 |
| Parity = 1                           | 19 (14.7%)                         | 6 (6.8%)                   |                 | 1.14                 | (0.44, 2.98)  | 0.787           |
| Parity = 2                           | 51 (39.5%)                         | 35 (39.8%)                 |                 | 1.19                 | (0.61, 2.32)  | 0.606           |
| Parity > 3                           | 28 (21.8%)                         | 19 (21.6%)                 |                 | 1.29                 | (0.61, 2.71)  | 0.502           |
| Drinking status, N (%)               |                                    |                            | 0.397           |                      |               |                 |
| No                                   | 127 (98.4%)                        | 85 (96.6%)                 |                 | 1.00                 | Reference     |                 |
| Yes                                  | 2 (1.6%)                           | 3 (3.4%)                   |                 | 0.05                 | (0.00, 67.95) | 0.408           |
| Smoking status, N (%)                |                                    |                            | 0.567           |                      |               |                 |
| No                                   | 128 (99.2%)                        | 86 (97.7%)                 |                 | 1.00                 | Reference     |                 |
| Yes                                  | 1 (0.8%)                           | 2 (2.3%)                   |                 | 0.05                 | (0.00, 43.19) | 0.377           |
| Number of underlying diseases, N (%) |                                    |                            | 0.930           |                      |               |                 |
| 0                                    | 80 (62.0%)                         | 51 (58.0%)                 |                 | 1.00                 | Reference     |                 |
| 1                                    | 36 (27.9%)                         | 28 (31.8%)                 |                 | 1.16                 | (0.65, 2.04)  | 0.619           |
| 2                                    | 10 (7.8%)                          | 7 (8.0%)                   |                 | 0.70                 | (0.25, 1.98)  | 0.500           |
| ≥ 3                                  | 3 (2.3%)                           | 2 (2.2%)                   |                 | 0.88                 | (0.12, 6.43)  | 0.899           |

Note: Values are presented as mean±standard deviation or N (%). M±SD, mean±standard deviation.
